# 1 Linking dynamic connectivity states 2 to cognitive decline and anatomical 3 changes in Alzheimer's disease

4 **Jacopo Tessadori<sup>1,4\*</sup>, Ilaria Boscolo Galazzo<sup>2</sup>, Silvia F. Storti<sup>2</sup>, Lorenzo Pini<sup>3</sup>,**  
5 **Lorenza Brusini<sup>2</sup>, Federica Cruciani<sup>2</sup>, Diego Sona<sup>1</sup>, Gloria Menegaz<sup>2</sup>, Vittorio**  
6 **Murino<sup>4,5</sup>**

**\*For correspondence:**

[jtessadori@fbk.eu](mailto:jtessadori@fbk.eu) (JT)

<sup>†</sup>These authors contributed  
equally to this work

<sup>‡</sup>These authors also contributed  
equally to this work

7 <sup>1</sup>Data Science for Health, Digital Health and Wellbeing Centre, Fondazione Bruno  
8 Kessler, Trento, 38123, Italy; <sup>2</sup>Department of Engineering for Innovation Medicine,  
9 University of Verona, Verona, 37134, Italy; <sup>3</sup>Department of Neuroscience and Padova  
10 Neuroscience Center, University of Padova, Padova, 35131, Italy; <sup>4</sup>Department of  
11 Informatics, Bioengineering, Robotics, and Systems Engineering (DIBRIS), University of  
12 Genova, Genova, 16146, Italy; <sup>5</sup>Department of Computer Science, University of Verona,  
13 Verona, 37134, Italy

---

15 **Abstract** Alterations in brain connectivity provide early indications of neurodegenerative  
16 diseases like Alzheimer's disease (AD). Here, we present a novel framework that integrates a  
17 Hidden Markov Model (HMM) within the architecture of a convolutional neural network (CNN) to  
18 analyze dynamic functional connectivity (dFC) in resting-state functional magnetic resonance  
19 imaging (rs-fMRI). Our unsupervised approach captures recurring connectivity states in a large  
20 cohort of subjects spanning the Alzheimer's disease continuum, including healthy controls,  
21 individuals with mild cognitive impairment (MCI), and patients with clinically diagnosed AD.  
22 The framework successfully identified distinct brain states associated with different clinical stages  
23 of AD, demonstrating a progressive reduction in functional flexibility as disease severity  
24 increased. Specifically, we observed that patients with AD spend more time in brain states  
25 dominated by unimodal sensory networks, while healthy controls exhibited more transitions to  
26 polymodal, cognitively demanding states. Importantly, the fraction of time spent in each state  
27 correlated with cognitive performance and anatomical atrophy in key regions, providing new  
28 insights into the disease's progression.  
29 Our findings suggest that the disruption of dynamic connectivity patterns in AD follows a  
30 two-stage model: early compensatory hyperconnectivity is followed by a decline in connectivity  
31 organization. This framework offers a powerful tool for early diagnosis and monitoring of AD  
32 progression and may have broader applications in studying other neurodegenerative conditions.  
33 *Index terms* - Alzheimer's disease, Cognitive impairment, Convolutional neural networks (CNNs),  
34 Hidden Markov Model (HMM), Resting-state functional magnetic resonance imaging (rs-fMRI),  
35 Unsupervised analysis

---

## 37 Introduction

38 Alzheimer's disease (AD) is the most common cause of dementia, characterized by a progressive de-  
39 cline in cognitive function. Early disruptions in neural connectivity, particularly in functional brain  
40 networks, have been identified as key indicators of the disease's onset and progression. Resting-

41 state functional magnetic resonance imaging (rs-fMRI) has emerged as a valuable tool for studying  
42 these connectivity alterations *van den Heuvel and Sporns (2019)*, allowing researchers to investi-  
43 gate how different brain regions communicate even in the absence of external stimuli. The analysis  
44 of functional connectivity (FC) from rs-fMRI can provide insights into how neurodegenerative pro-  
45 cesses unfold, offering potential biomarkers for early diagnosis and tracking disease progression.

46 Traditional methods of analyzing FC, such as seed-based correlation and independent compo-  
47 nent analysis, typically assume that connectivity is static throughout the fMRI scan. However, re-  
48 cent advances in neuroscience emphasize the dynamic nature of brain connectivity, where distinct  
49 patterns of FC emerge and dissipate over time *Favaretto et al. (2022)*; *Fiorenzato et al. (2019)*;  
50 *de Vos et al. (2018)*. Dynamic functional connectivity (dFC) captures this temporal variability, of-  
51 fering a more nuanced view of brain network alterations that may be critical in understanding  
52 diseases like AD. Previous research has shown that dynamic changes in connectivity states may  
53 reflect compensatory mechanisms in early stages of AD, followed by a breakdown of connectivity  
54 organization as the disease progresses.

55 Despite these advancements, current methods for analyzing dFC often rely on disjointed pro-  
56 cessing pipelines, where FC computation, dimensionality reduction, and state classification occur  
57 in separate stages. This fragmentation can hinder the optimization of dFC models, limiting their  
58 ability to provide a comprehensive understanding of connectivity patterns. To address this, we  
59 introduce a novel unsupervised deep learning framework that integrates a Hidden Markov Model  
60 (HMM) within a convolutional neural network (CNN). This end-to-end architecture simultaneously  
61 optimizes both functional connectivity state identification and sequence likelihood, providing a ro-  
62 bust, dynamic representation of brain activity.

63 The use of Hidden Markov Models (HMMs) for the analysis of FC states is not novel, in itself, but  
64 past approaches typically relied on disjointed processing pipelines. In contrast, our method incor-  
65 porates HMMs directly within a deep neural network, ensuring optimal clustering of brain states in  
66 a single architecture. For example, HMMs have been used to characterize brain state dynamics in  
67 PTSD subjects *Ou et al. (2015)*, to estimate both static and abruptly changing patterns in children  
68 and adults *Zhang et al. (2019)* and, more recently, to infer emotions evoked with naturalistic stimuli  
69 *Tan et al. (2022)*. The closest approach to the one we describe here is perhaps that by Suk et al.  
70 *Suk et al. (2016)*, where a deep neural network is employed for dimensionality reduction, followed  
71 by a HMM for temporal cluster identification. Nevertheless, in all of the models described above,  
72 HMMs are applied after a rather lengthy and separated data preparation phase, whose disjointed  
73 application could potentially hinder a comprehensive optimization of the process. In our knowl-  
74 edge, the present work is the first attempt to provide the integration of a HMM directly in a deep  
75 neural network.

76 We apply this framework to a large cohort of subjects spanning the Alzheimer's disease contin-  
77 uum, from healthy controls to individuals with mild cognitive impairment (MCI) and clinically diag-  
78 nosed AD. By identifying recurring connectivity states, our model reveals significant alterations in  
79 brain network flexibility associated with AD progression. Specifically, we observe that patients with  
80 AD exhibit prolonged engagement in brain states dominated by unimodal cortices, while healthy  
81 individuals show more frequent transitions to polymodal, cognitively demanding states. These find-  
82 ings align with the growing body of research suggesting reduced metabolic activity and impaired  
83 network integration in AD.

84 Furthermore, our results demonstrate that the fraction of time spent in specific connectivity  
85 states correlates with clinical measures of cognitive function and anatomical atrophy in key brain  
86 regions. This dynamic, state-based approach to functional connectivity offers a new perspective  
87 on the early detection and monitoring of AD, with potential implications for other neurodegener-  
88 ative conditions. Our method not only identifies clinically relevant connectivity patterns but also  
89 provides a scalable tool for exploring brain network dynamics in a wide range of neurological dis-  
90 orders.

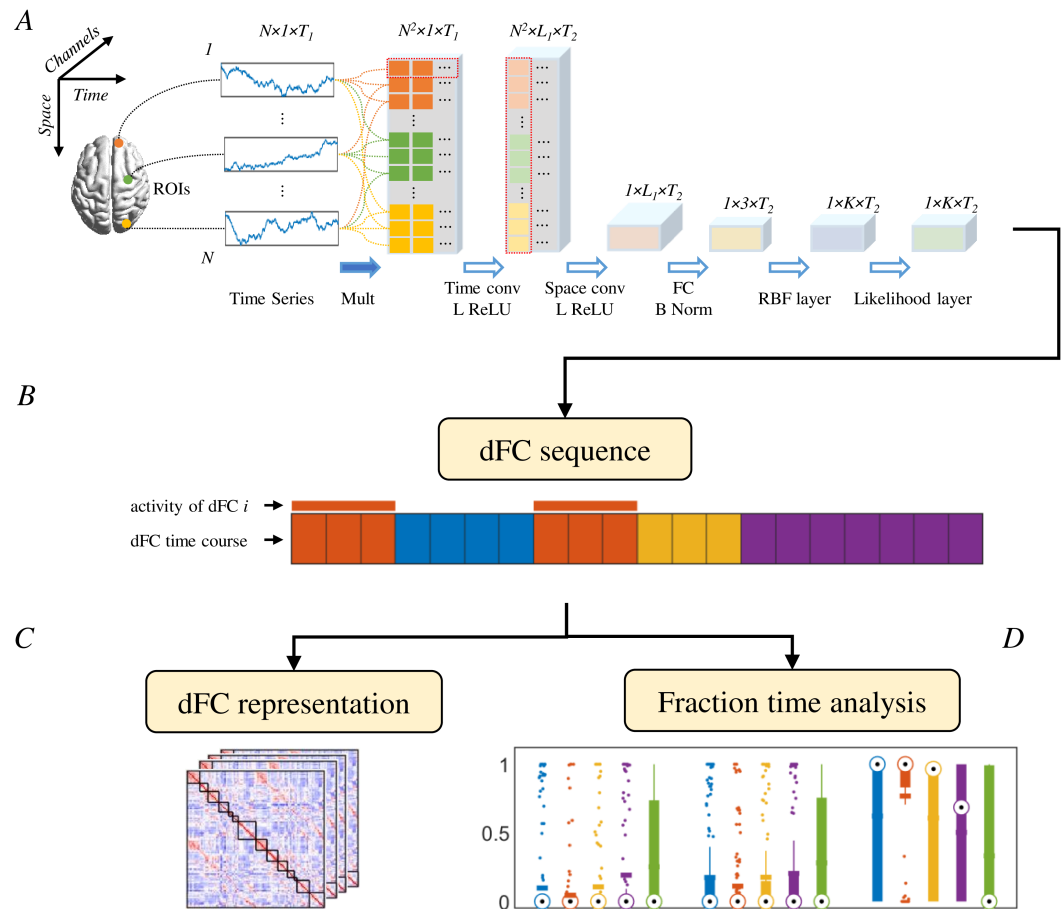

**Figure 1.** A. Architecture of the proposed framework for dFC construction and analysis using fMRI data. The network receives as inputs the pairwise products of fMRI time series from all ROIs, then two convolutional layers (time conv and space conv) compute time-weighted correlations and provide a low dimensional representation of input data. The last two layers (RBF and expectation layer) reconstruct the most likely sequence of states in the input time series. B. From the output of the neural network, a discrete time series is derived, in which each value indicates the most likely active state for that time point. C. An approximate representation of the different states is provided. D. The fraction time of the identified recurring states is calculated and investigated as a possible marker of AD progression, also in association with cognitive/clinical scores and neurodegenerative trajectories.

## 91 Results

### 92 Experimental settings

93 We performed two experiments, on data from 1) HC and full-blown AD subjects and 2) in the whole  
 94 AD clinical spectrum (SMC, eMCI, IMCI, and AD). With the first experiment, we aimed to identify a  
 95 subset of dFCs (dynamic functional connectivity states) common in both HC and AD subjects. In  
 96 the second set of experiments, we intended to demonstrate how the distribution of fraction times  
 97 for the identified dFCs changed according to the clinical condition (from HC to AD) and whether it  
 98 related to behavior and neurodegenerative trajectories. All experiments were unsupervised and  
 99 training was performed on all relevant data at once (i.e., no cross-validation was performed).

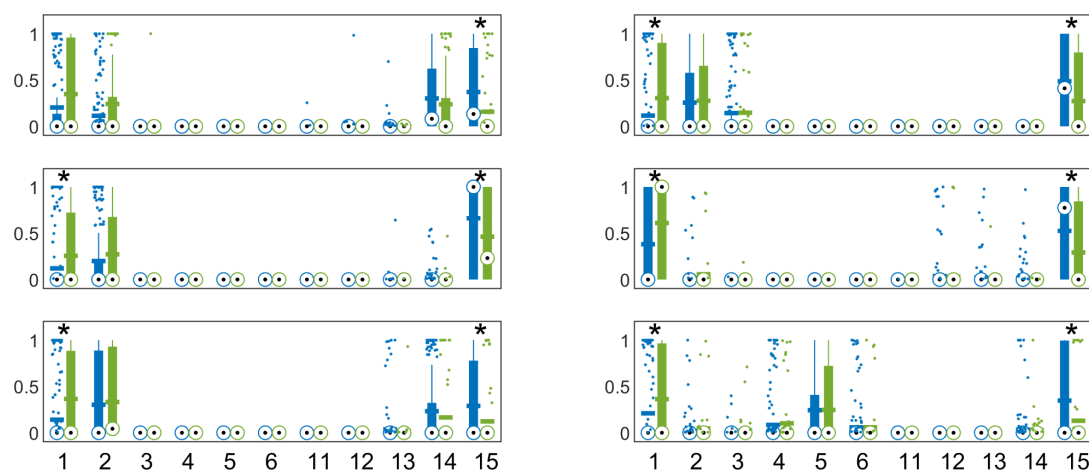

**Figure 2.** Fraction times for all 6 training runs, with distributions relative to HCs in blue and ADs in green. The symbol \* indicates  $p$ -value  $< 0.05$  for Wilcoxon's test for equal median, with Benjamini-Hochberg correction for  $n=66$  multiple comparisons, 226 HCs, 67 ADs. Circled black dots indicate median values of each distributions, horizontal bars indicate the mean, while bottom and top edges of the box extend to the 25th and 75th percentiles, respectively. Whiskers extend to the most extreme data points not considered outliers (plotted individually as small dots). The representation order is based on the difference between the mean fraction times of HCs and ADs, with ADs over-represented on the left and HCs over-represented on the right. Only 11 distribution pairs are represented, as, after sorting, 4 dFCs positions are never occupied.

## 100 Population comparisons: HC and AD

101 To demonstrate the variability and reproducibility of the results obtained from the adopted model,  
102 we conducted six separate training runs on the HC-AD subset using identical inputs: the only dif-  
103 ference among them is, therefore, the random initialization of the model. Each subplot in fig. 2  
104 shows the fraction time of the dFCs identified for a sample training run of the HC-AD experiment.  
105 The model is designed to identify a maximum of 15 distinct dFCs. It is evident how, with the adopted  
106 settings, no more than 8 dFCs are ever observed in a single training run. Furthermore, some of  
107 the most commonly occurring states appear with significantly different fraction times between  
108 HC and AD subjects, as confirmed by statistical analysis (Wilcoxon's tests for equal medians with  
109 Benjamini-Hochberg correction, corrected  $p$ -values smaller than 0.05 are marked with asterisks).

110 Comparing the results of the six runs can be challenging due to the unsupervised nature of  
111 the experiments, which led to the arbitrary numbering of identified dFCs. To facilitate comparison,  
112 dFCs have been sorted according to the gap in mean fraction time between HC and AD populations.  
113 Using this sorting approach, only 11 out of the possible 15 ranks have at least one non-empty  
114 instance across the six training runs. The remaining four positions have been omitted from fig. 2.

115 With the precautions outlined above, it was possible to verify whether, in different training  
116 repetitions, the attributions to a given dFCs were consistent with one another: we performed a  
117 permutation test. For dFCs 1, 2 and 15, the counts of matching time volumes in all the six training  
118 runs (e.g. for subject 1, time point 1 is always identified as dFCs 1) are at least one order of mag-  
119 nitude higher than the average across permutations (table 1), suggesting that the observed match  
120 counts are significantly higher than what can be expected by random chance ( $p$ -value  $\approx 0$  for dFCs  
121 1, 2 and 15, Wilcoxon signed rank for median of permutations equal to observed value). Therefore,  
122 we can state that these three dFCs were reliably identified in all training runs, thus we decided to  
123 focus on them in the rest of the paper. It is worth pointing out that the existence of a significant  
124 number of time volumes systematically attributed to the same dFCs across training runs implied  
125 that the ranking of dFCs (at least for states 1, 2 and 15) was always consistent.

**Table 1.** Counts of time volumes across all subjects attributed to same dFCs in all training runs in observed data and permutation tests

| dFCs | Observed | Mean perm. | SD perm |
|------|----------|------------|---------|
| 1    | 4586     | 8.6        | 3.0     |
| 2    | 130      | 1.0        | 1.0     |
| 3    | 0        | 0          | 0       |
| 4    | 0        | 0          | 0       |
| 5    | 0        | 0          | 0       |
| 6    | 0        | 0          | 0       |
| 11   | 0        | 0          | 0       |
| 12   | 0        | 0          | 0       |
| 13   | 0        | 0          | 0       |
| 14   | 0        | 0          | 0.2     |
| 15   | 5638     | 208.1      | 14.3    |

## 126 Dynamic functional states and their representation

127 In order to provide a representation of the dFCs, we identified the time volumes that were system-  
128 ically attributed to dFCs 1, 2 and 15 in all experimental repetitions and constructed "traditional"  
129 dynamic FC matrices from the relevant sections of the individual recordings. More in detail, we set  
130 the size of each rectangular window to 60 s, so every single FC matrix is constructed with the same  
131 data that the convolutional section of the model uses, even though with different time weights. Rep-  
132 resentations of each dFCs were then obtained by taking the median value from the resulting FCs  
133 across all HC/AD subjects. The results are displayed in fig. 3, where the FC matrices are reported  
134 along with the information of Yeo's 7 networks *Schaefer et al. (2018)* (visual - VIS, somatomotor -  
135 SMN, dorsal-attention - DAN, ventral-attention - VAN, limbic - LIM, frontoparietal - FPN and default  
136 mode network - DMN, for left and right hemispheres).

## 137 Population comparisons: All groups

138 In our second experiment, the model was trained on subjects from the 5 available populations.  
139 Given the stability of the results observed in the previous experiment, we deemed it sufficient to  
140 perform only one repetition of model training. We sorted the order of the identified dFCs exactly  
141 as in the previous case. Fraction times are reported in fig. 4, panel A. It is possible to appreciate  
142 a state-clinical gradient in terms of fraction times. Specifically, AD, and IMCI patients spent more  
143 time in state 1 and state 2, showing a decrease for state 15. HC subjects show a divergent pattern,  
144 with the highest fraction of time in state 15 and a steady decrease in states 1 and 2. Notably, the  
145 SMC groups showed a similar trend compared to HC, with even an higher amount of time spent in  
146 state 15 compared to the healthy counterpart. Table 2 displays the  $p$ -values for Kruskal-Wallis tests  
147 for equal distributions performed on the state-specific fraction times, with Dunn-Sidak correction  
148 for multiple comparisons.

## 149 Clinico-anatomical interplay with dFCs

150 In order to investigate whether the identified dFCs have a behavioral meaning, we tested for a possi-  
151 ble association between state-specific fraction times and three different clinical scores widely used  
152 in AD: Alzheimer's Disease Assessment Scale (ADAS11), Mini-Mental State Examination (MMSE) and  
153 Clinical Dementia Rating Scale Sum of Boxes (CDRSB). The rationale behind this analysis is that if  
154 a specific brain state is neurobiologically relevant, its occurrence (as measured by fraction time)  
155 might be associated with cognitive performance and clinical outcomes.

156 HC and AD subjects were involved in the sorting of states, thus in their numbering. In order to  
157 eliminate any possible confounding effects on the results of the association analysis, this has been  
158 restricted to MCI and SNC populations. For each dFCs, MCI and SMC subjects have been divided

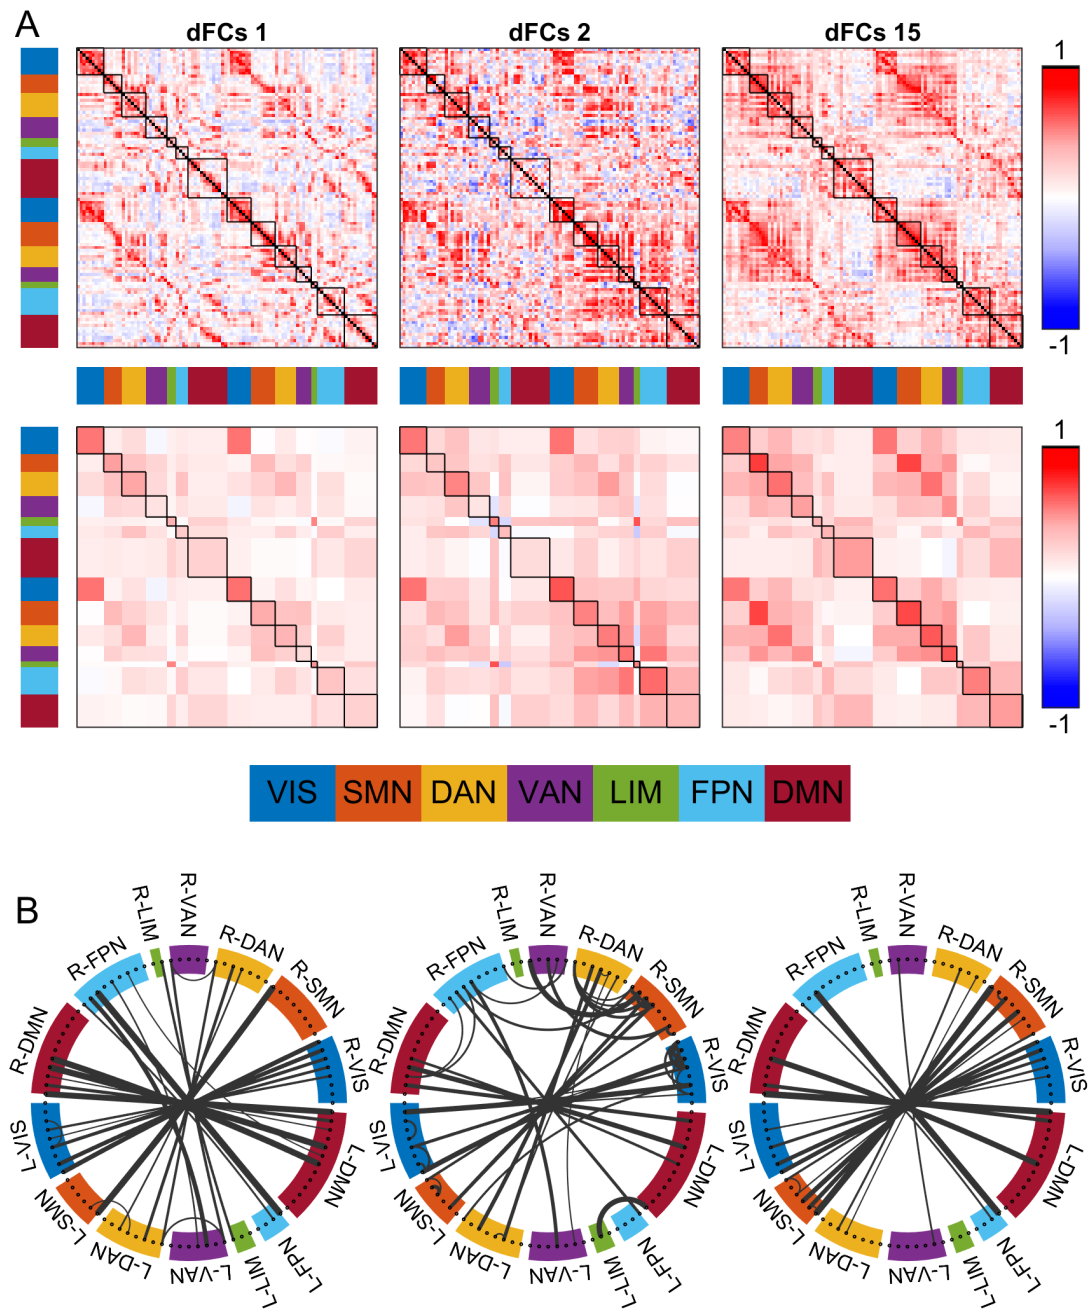

**Figure 3.** Panel A. Median of FC matrices attributed to dFCs 1, 2, and 15 (respectively for left, middle and right columns) over all training repetitions. The color bar on the right is the same for all panels, while the multicolor bars on the left and bottom of each image provide labelling for the different networks covered by the Schaefer atlas with 7 networks. Bottom row panels display the same data but averaged over intra/inter-networks (excluding values on the main diagonal). Panel B. Connectograms of median FC matrices over all training repetitions. Only connections with values above 0.85 are represented, with line thickness proportional to the connection strength.

159 in two sub-populations: one for subjects with fraction times for a given dFCs greater or equal to  
 160 0.5 and the second for subjects showing that dFCs for less than half of the recording time. As the  
 161 different sub-populations had different age ranges, the different groups obtained in the previous  
 162 step have been age-corrected as detailed in the Materials and Methods section in order to minimize  
 163 any possible impact of age on the outcome. The resulting distributions of the clinical scores in the



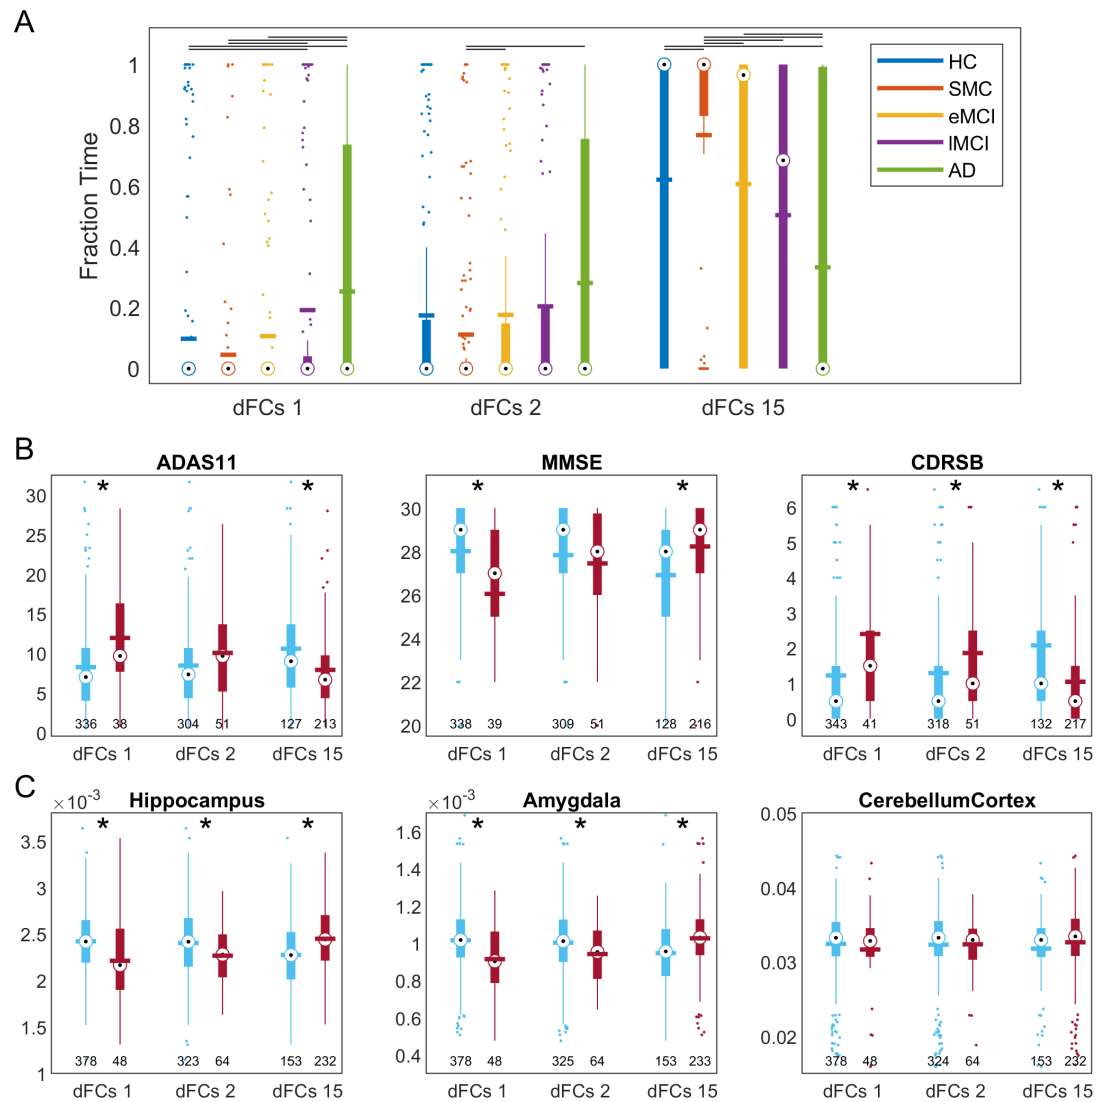

**Figure 4.** Panel A. Fraction times of the three recurring dFCs, with distributions separated by subject group. The significance between each pair of groups has been tested with Kruskal-Wallis test for equal distributions, with Dunn-Sidak correction to account for the multiple comparisons. The horizontal black lines in the top part of the figure link distributions for which  $p$ -values are smaller than 0.05.  $n=226$  HCs, 160 SMCs, 144 eMCIs, 130 IMCIs, 67 ADs. Boxplots are built as in fig. 2. Panel B. Distribution of three clinical scores in the two sub-populations identified according to the fraction times of each dFCs, with blue and red bars for subjects with fraction times less than (or equal to) and greater than 0.5, respectively. The symbol \* indicates  $p$ -value smaller than 0.05 (Benjamini-Hochberg correction for 9 comparisons).  $n$  changes for each sub-population and ranges between 38 and 343 (exact values below each boxplot). Panel C. Distribution of normalized volumes for three well-known regions in the sub-populations identified by fraction times of each dFCs as described in Panel B. The symbol \* indicates  $p$ -value smaller than 0.05 (Benjamini-Hochberg correction for 9 comparisons).  $n$  changes for each sub-population and ranges between 48 and 378 (exact values below each boxplot).

164 two sub-populations are represented in fig. 4, panel B. In order to test for a possible association,  
 165 a Wilcoxon test was conducted for each pair, with a Benjamini-Hochberg correction for multiple  
 166 comparisons ( $n=9$ ). Resulting  $p$ -values are presented in table 3. The statistical analyses highlighted  
 167 a significant association between the fraction times of dFCs 1 and 15, and all the three clinical  
 168 scores. Subjects with higher fraction time for dFCs 15 showed the best clinical scores compared to  
 169 the cohort expressing less rs-fMRI frames for this dFCs. This result was reversed for state 1, while  
 170 state 2 proved significantly associated only with the CDRSB score.

**Table 2.** *p*-values of fraction times comparisons in different populations, Kruskal-Wallis test for equal distributions, Dunn-Sidak correction for multiple comparisons ( $n=10$ ).

| Group 1 | Group 2 | dFC 1           | dFC 2       | dFC 15          |
|---------|---------|-----------------|-------------|-----------------|
| HC      | SMC     | 0.86            | 0.51        | <b>0.03</b>     |
| HC      | eMCI    | 1.00            | 0.83        | 0.98            |
| HC      | IMCI    | <b>&lt;1e-2</b> | 1.00        | 0.13            |
| HC      | AD      | <b>&lt;1e-2</b> | 0.56        | <b>&lt;1e-4</b> |
| SMC     | eMCI    | 0.53            | <b>0.03</b> | <b>&lt;1e-2</b> |
| SMC     | IMCI    | <b>&lt;1e-2</b> | 0.40        | <b>&lt;1e-4</b> |
| SMC     | AD      | <b>&lt;1e-3</b> | <b>0.03</b> | <b>&lt;1e-4</b> |
| eMCI    | IMCI    | 0.14            | 0.99        | 0.84            |
| eMCI    | AD      | <b>0.03</b>     | 1.00        | <b>&lt;1e-2</b> |
| IMCI    | AD      | 0.99            | 0.87        | 0.11            |

**Table 3.** *p*-values of population comparisons of clinical scores in sub-populations divided by state fraction times (Wilcoxon's test with Benjamini-Hochberg's correction for  $n = 9$  comparisons).

| Score  | dFCs 1          | dFCs 2      | dFCs 15         |
|--------|-----------------|-------------|-----------------|
| ADAS11 | <b>&lt;1e-3</b> | 0.08        | <b>&lt;1e-4</b> |
| MMSE   | <b>&lt;1e-4</b> | 0.11        | <b>&lt;1e-4</b> |
| CDRSB  | <b>&lt;1e-3</b> | <b>0.05</b> | <b>&lt;1e-4</b> |

171 Similarly, we explored a possible association between fraction times and anatomical variations  
 172 in MCI and SMC groups. In this case, we tested whether the sub-populations identified by frac-  
 173 tion time thresholding were characterized by significant differences in the relative volumes of hip-  
 174 pocampus, amygdala and cerebellum cortex. The former two regions are known to be vulnerable  
 175 to AD pathology, whereas the latter is generally preserved even in the latest stages (*Braak and*  
 176 *Braak (1991); Thompson et al. (2003); Frisoni et al. (2002)*). Fig. 4, panel C displays average relative  
 177 volumes for the obtained sub-populations, after age-correction. Table 4 reports the *p*-values of a  
 178 Wilcoxon test for different median conducted on each pair of subpopulations, with a Benjamini-  
 179 Hochberg correction for multiple comparisons. Fraction times of all the considered states dis-  
 180 played an association with relative volumes of hippocampus and amygdala, while differences for  
 181 the cerebellum cortex resulted not significant at the 0.05 level.

## 182 Discussion

183 In this study, we introduced a novel framework integrating a Hidden Markov Model (HMM) within  
 184 a convolutional neural network (CNN) to capture dynamic functional connectivity (dFC) states in  
 185 subjects across the Alzheimer's disease (AD) continuum. Our results provide compelling evidence  
 186 that functional connectivity states do not disappear with disease progression but rather become  
 187 progressively harder to reach. These findings suggest that the weakening of specific links or the  
 188 atrophy of brain regions may be a consequence of shifts in the dominant connectivity patterns,  
 189 rather than the result of isolated or localized damage. While this hypothesis requires further in-

**Table 4.** *p*-values of population comparisons of relative region volumes in sub-populations divided by state fraction times (Wilcoxon's test, Benjamini-Hochberg's correction for  $n = 9$  comparisons).

| Score            | dFCs 1          | dFCs 2      | dFCs 15         |
|------------------|-----------------|-------------|-----------------|
| Hippocampus      | <b>&lt;1e-2</b> | <b>0.01</b> | <b>&lt;1e-3</b> |
| Amygdala         | <b>0.01</b>     | <b>0.01</b> | <b>&lt;1e-3</b> |
| CerebellumCortex | 0.41            | 0.47        | 0.25            |



190 vestigation, it opens new directions in understanding AD pathophysiology and the progression of  
191 neurodegenerative disorders.

### 192 **Dynamic functional connectivity and disease progression**

193 Previous studies have demonstrated that brain networks, particularly the default mode network  
194 (DMN) and salience network (SAN), exhibit reduced functional connectivity in AD patients *Agosta*  
195 *et al. (2012)*; *Brier et al. (2012)*; *Greicius et al. (2004)*; *Dai et al. (2015)*; *Gu et al. (2020)*. Traditionally,  
196 these changes have been interpreted as localized network disruptions due to structural atrophy,  
197 particularly in regions like the hippocampus and posterior cingulate cortex (PCC) *He et al. (2007)*;  
198 *Bullmore and Sporns (2009)*; *Teipel et al. (2018)*. However, our findings suggest a different mecha-  
199 nism: the reduced frequency with which certain dynamic states are accessed could underlie the de-  
200 cline in functional connectivity observed in these regions. Rather than being disrupted altogether,  
201 these states persist but become harder to reach, implying that network flexibility diminishes over  
202 time.

203 This interpretation is in line with the emerging understanding of AD as a disorder not only of  
204 localized damage but also of global network dysfunction. Our results support the idea that the  
205 brain's inability to transition between different connectivity states could drive functional decline,  
206 reinforcing the need to study connectivity dynamics as a hallmark of disease progression.

### 207 **Compensatory mechanisms and network flexibility**

208 In the early stages of AD, some studies suggest that hyperconnectivity may act as a compensatory  
209 mechanism to maintain cognitive performance *Chiesa et al. (2019)*; *Li et al. (2018)*; *Chen et al.*  
210 *(2020)*. Our analysis provides further evidence for this, as subjects with early mild cognitive im-  
211 pairment (MCI) exhibited relatively higher fractions of time spent in cognitively demanding states  
212 compared to later stages. These findings align with the two-stage model of AD progression, in  
213 which initial compensation is followed by a gradual breakdown of connectivity.

214 However, the diminishing ability to reach certain states may signify the loss of this compen-  
215 satory capacity, leading to cognitive decline. The decreased network flexibility observed in AD  
216 patients may stem from a progressive inability to transition from states characterized by unimodal  
217 sensory network activity to more polymodal, higher-order states. This suggests that targeting treat-  
218 ments to preserve or restore network flexibility could be a promising avenue for early interven-  
219 tions.

### 220 **Linking connectivity states to behavior and anatomy**

221 One of the key contributions of this study is the linkage between dynamic connectivity states,  
222 cognitive performance, and anatomical atrophy. Our results showed that the fraction of time  
223 spent in specific connectivity states correlated with well-established clinical measures such as the  
224 Alzheimer's Disease Assessment Scale (ADAS11) and Mini-Mental State Examination (MMSE), as  
225 well as anatomical atrophy in regions like the hippocampus and amygdala. This provides a new  
226 perspective on how the brain's dynamic functional connectivity relates to both behavior and struc-  
227 tural degeneration.

228 While previous studies have explored the relationship between functional connectivity and cog-  
229 nitive decline *Bergamino et al. (2024)*; *Huang et al. (2022)*, few have made direct connections be-  
230 tween dynamic states, behavior, and anatomical features. Our findings suggest that the weakening  
231 of certain connectivity states is not merely a reflection of structural damage, but may actively con-  
232 tribute to the progression of neurodegenerative changes. These results support the notion that  
233 alterations in functional connectivity could precede and potentially drive the structural atrophy  
234 observed in key regions affected by AD.

## 235 **Implications and future directions**

236 The implications of our findings are twofold. First, they highlight the need to investigate the tem-  
237 poral dynamics of functional connectivity in greater detail, particularly in relation to how these dy-  
238 namics evolve with disease progression. The persistence of connectivity states, even in advanced  
239 AD, suggests that interventions aimed at preserving the brain's ability to transition between states  
240 could help slow cognitive decline. This aligns with recent research advocating for network-based  
241 approaches to neurodegeneration, where restoring or maintaining connectivity may be more im-  
242 portant than targeting specific regions of atrophy *Hammond et al. (2020)*; *Strom et al. (2022)*.

243 Second, our work underscores the potential of dynamic connectivity analysis as a diagnostic  
244 tool. By identifying patterns of state transitions that correlate with cognitive performance and  
245 anatomical degeneration, we can develop more sensitive biomarkers for early-stage AD detec-  
246 tion. Additionally, this approach may be applicable to other neurodegenerative conditions, such  
247 as Parkinson's disease or frontotemporal dementia, where similar disruptions in brain network  
248 dynamics are thought to play a role.

## 249 **Limitations**

250 Despite these promising findings, our approach has several limitations. While we successfully iden-  
251 tified connectivity states associated with cognitive decline, the long durations of these states may  
252 limit their utility for direct classification purposes. The persistence of states across different stages  
253 of AD suggests that classification based on state frequency alone may not capture the full com-  
254 plexity of the disease. Future work should explore more granular, transient sub-states that could  
255 provide additional diagnostic value.

256 Moreover, the link between dynamic connectivity states and structural atrophy, while com-  
257 pelling, requires further validation. Longitudinal studies are needed to determine whether changes  
258 in network flexibility precede or follow anatomical degeneration. Additionally, our current model  
259 does not account for individual variability in disease progression, which may affect the generaliz-  
260 ability of our findings to broader populations.

## 261 **Conclusion**

262 This study provides strong evidence for the role of dynamic functional connectivity in Alzheimer's  
263 disease progression. Our results suggest that changes in network flexibility, rather than the dis-  
264 appearance of specific connectivity states, may drive cognitive decline and neurodegeneration. By  
265 linking dynamic connectivity states to both cognitive performance and anatomical atrophy, we of-  
266 fer a novel perspective on how brain network dynamics contribute to AD pathology. These findings  
267 pave the way for future investigations into network-based interventions that aim to preserve func-  
268 tional flexibility and slow disease progression.

## 269 **Material and Methods**

### 270 **Study cohort**

271 The data used in this study were obtained from the Alzheimer's Disease Neuroimaging Initiative  
272 (ADNI) Phase 3 (ADNI-3) and include T1-weighted and resting-state functional MRI (rs-fMRI) scans.  
273 The selected cohort comprises 601 subjects, categorized into five groups: 225 healthy controls  
274 (HC), 155 significant memory concern (SMC), 143 early mild cognitive impairment (eMCI), 130 late  
275 mild cognitive impairment (lMCI), and 67 individuals with Alzheimer's disease (AD). Further details  
276 on the cohort demographics are available in the Supplementary Information.

### 277 **MRI data acquisition and preprocessing**

278 Resting-state fMRI scans were acquired using 3T MRI scanners, with 200 fMRI volumes collected for  
279 most participants. T1-weighted structural images were also available for all subjects. Preprocess-  
280 ing of the rs-fMRI data followed standard procedures, including motion correction, normalization,

281 and spatial smoothing. Further details on the acquisition parameters and preprocessing steps are  
282 available in the Supplementary Information.

### 283 **Deep network model**

284 The deep network model employed in this study is designed to address specific challenges in the  
285 analysis of dynamic FC. The structure of this network is presented in the following table ??, along  
286 with the dimension of the activations of each layer in space (S), channels (C) and time (T). Further  
287 details on each layer can be found in the Supplementary Information.

**Table 5.** Network model structure and activations

| Layer type                 | Activation size                         |
|----------------------------|-----------------------------------------|
| Sequence input             | $1e4 (S) \times 1 (C) \times 192 (T)$   |
| Temporal convolution layer | $1e4 (S) \times L_1 (C) \times 173 (T)$ |
| Leaky ReLU                 | $1e4 (S) \times L_1 \times 173 (T)$     |
| Spatial convolution layer  | $1 (S) \times L_2 (C) \times 173 (T)$   |
| Leaky ReLU                 | $1 (S) \times L_2 (C) \times 173 (T)$   |
| Fully connected layer      | $1 (S) \times 3 (C) \times 173 (T)$     |
| Batch normalization        | $1 (S) \times 3 (C) \times 173 (T)$     |
| RBF layer                  | $1 (S) \times K (C) \times 173 (T)$     |
| Likelihood layer           | $1 (S) \times K (C) \times 173 (T)$     |

### 288 Convolutional layers

289 The convolutional section, inspired by the neural network described in Jie et al. *Jie et al. (2020)*, is  
290 designed to overcome the issues associated with the sliding-window approach and identify rele-  
291 vant spatial patterns. This is achieved by designing short-scale time and spatial kernels that provide  
292 a compact representation of the input data.

### 293 Leaky ReLUs

294 We chose to adopt leaky ReLUs as non-linearities because the radial basis function layer (described  
295 below) is sensitive to the distribution of its inputs. Ideally, the inputs to the radial basis func-  
296 tion layer should resemble a mixture of several multivariate normal distributions. However, when  
297 paired with ReLUs or tanh layers, the inputs are often concentrated around extreme values, caus-  
298 ing the radial basis function layer to under-perform. Leaky ReLUs help mitigate this issue by allow-  
299 ing a wider range of values to pass through, resulting in a more suitable input distribution for the  
300 radial basis function layer.

### 301 Radial basis function

302 A radial basis function (RBF) layer is incorporated to estimate the likelihoods of the outputs from  
303 the first section of the network. This layer essentially estimates the probability of the system being  
304 in a specific state at a given time, independent of its relation with preceding and following time  
305 points.

### 306 Likelihood layer

307 The final layer, termed the 'Likelihood layer', implements the core of the HMM. This layer ensures  
308 that the identified states are not just the most likely in isolation, but also when considering the  
309 entirety of the time sequence. It computes the likelihood of observing the sequence of inputs,  
310 taking into account the temporal dependencies between states.

### 311 Loss function

312 The loss function used for network training is a function of two terms: the first is the opposite of  
313 the log-likelihood of the most probable sequence, while the second term is obtained by comput-

314 ing the same quantity for a sham sequence in which the time positions of the network inputs have  
315 been randomly shuffled. This second term has been introduced to prevent a possible degenerate  
316 solution, in which the width parameter of all RBF neurons but one become so small as to be irrel-  
317 evant and each sequence is decoded as a constant repetition of the state corresponding to the  
318 only "large" neuron left. This issue is prevented with the addition of the second loss term, which  
319 ensures that the order of inputs is relevant.

### 320 **Network training**

321 The optimizer used was ADAM, learning rate was constant and set to 1e-3. Gradient decay was  
322 set to 0.75, while squared gradient decay to 0.95. Batch size corresponded to ~4% of available  
323 subjects in the HC-AD experiments, ~2% when analyzing all available data. Training proceeded for  
324 15 epochs, with no early-stop conditions.  $L_1$ ,  $L_2$ , and  $K$  were constant for all experiments and set  
325 to 16, 32, and 15, respectively. The length of the temporal filters was 20 time volumes, while spatial  
326 filters had the same size as the input space (1e4 dimensions).

### 327 **Dynamic functional connectivity states analysis**

#### 328 Fraction times

329 The output of the network described above is the clustering of each time volume, for every subject,  
330 in one of the possible dynamic functional connectivity states (dFCs). We decided to compare sub-  
331 jects across populations in terms of the fraction times ( $f_k$ ) of each dFCs, given by the percentage  
332 of times during which the state is active:

$$f_k := \frac{\#(x(n) = k)}{T}, k = 1, \dots, K \quad (1)$$

333 where  $\#(a)$  is the number of times for which condition  $a$  is verified and  $T$  is the total length of the  
334 time series (in this case, the length of the network output, 173).

#### 335 dFCs sorting and permutation test

336 The network training procedure is completely unsupervised: as a consequence, the order of clus-  
337 ters is random in each training run. We addressed this problem by sorting the identified dFCs:  
338 fraction times for each dFCs were computed and then averaged separately for HC and AD popula-  
339 tions. Sorting occurred based on the difference between average fraction time in AD and average  
340 fraction time in HC.

341 An additional issue we encountered is that, due to the stochastic initialization of the network,  
342 the attribution of dFCs is not entirely consistent across different training runs. To verify that the ob-  
343 served overlap of dFCs across all training runs is significantly greater than what could be expected  
344 by chance alone, we performed a permutation test.

345 In more detail, we first calculated the total number of time volumes attributed to the same dFCs  
346 across all subjects and training runs. Then, we randomly shuffled the dFCs labels and performed  
347 the same calculation. This label-shuffling procedure was repeated 10,000 times, generating a dis-  
348 tribution of counts under the null hypothesis that the overlap of dFC states is due to chance.

349 Next, we used a two-sided Wilcoxon signed-rank test to assess whether the median of the dis-  
350 tribution of counts from the permutations is significantly different from the observed count of  
351 overlapping dFCs. This test allowed us to determine if the observed degree of overlap in dFCs  
352 attributions across training runs is greater than what would be expected by chance alone.

#### 353 Fraction times group comparisons

354 For the dFCs consistently identified across training runs, we assessed whether the observed frac-  
355 tion of time spent in each dFCs significantly differed across the five available populations (HC, SMC,  
356 eMCI, IMCI, and AD): we conducted a Kruskal-Wallis test, with the null hypothesis stating that the  
357 observed fraction time for each population originates from the same underlying distribution. To  
358 account for multiple comparisons and control the family-wise error rate, we applied a Dunn-Sidak

359 correction to the p-values obtained from pairwise comparisons between populations (with a total  
360 of 10 pairwise comparisons in this case).

### 361 Clinico-anatomical comparisons and age correction

362 Association tests between the fraction times of each dFCs and clinico-anatomical variables were  
363 performed only on subjects in the SMC and MCI populations. The rationale for this choice is that  
364 both the HC and AD groups were used for the ranking of the identified clusters; thus, their use in  
365 this case could produce spurious results.

366 For each association test, we split the combined SMC-MCI population into two subgroups based  
367 on the fraction time of the dFC currently being tested. One subpopulation consisted of subjects  
368 who showed the dFC under examination for more than half of the available time points, while the  
369 other subpopulation included the remaining subjects. In order to eliminate a possible confound  
370 due to age, we used an iterative approach to balance the age distribution between the two subpopu-  
371 lations: we randomly selected and removed a subject from the most extreme age quartile from the  
372 majority subpopulation until the ages of the two groups were not significantly different, as deter-  
373 mined by a Wilcoxon rank test for equal medians with a significance level of 0.2. Finally, we tested  
374 each clinical and anatomical variable for different medians among the two subpopulations using a  
375 two-sided Wilcoxon rank sum test, followed by a Benjamini-Hochberg correction for multiple tests.  
376 dFCs-feature pairs that rejected the null hypothesis of equal medians were considered to have a  
377 significant association.

### 378 Hardware and software

379 All the algorithms described in this paper have been developed on a Asus ROG Strix PC, sporting an  
380 AMD Ryzen 9 6900HX and NVIDIA GeForce RTX 3070 Ti Laptop GPU. The OS is Microsoft Windows  
381 11, while the actual code has been developed in MATLAB R2022a.

### 382 References

- 383 **Agosta F**, Pievani M, Geroldi C, Copetti M, Frisoni GB, Filippi M. Resting state fMRI in Alzheimer's disease: beyond  
384 the default mode network. *Neurobiology of aging*. 2012; 33(8):1564–1578.
- 385 **Bergamino M**, Burke A, Sabbagh MN, Caselli RJ, Baxter LC, Stokes AM. Altered resting-state functional connec-  
386 tivity and dynamic network properties in cognitive impairment: an independent component and dominant-  
387 coactivation pattern analyses study. *Frontiers in Aging Neuroscience*. 2024; 16. [https://www.frontiersin.org/](https://www.frontiersin.org/journals/aging-neuroscience/articles/10.3389/fnagi.2024.1362613)  
388 [journals/aging-neuroscience/articles/10.3389/fnagi.2024.1362613](https://www.frontiersin.org/journals/aging-neuroscience/articles/10.3389/fnagi.2024.1362613), doi: 10.3389/fnagi.2024.1362613.
- 389 **Braak H**, Braak E. Neuropathological staging of Alzheimer-related changes. *Acta neuropathologica*. 1991;  
390 82(4):239–259.
- 391 **Brier MR**, Thomas JB, Snyder AZ, Benzinger TL, Zhang D, Raichle ME, Holtzman DM, Morris JC, Ances BM. Loss  
392 of intranetwork and internetwork resting state functional connections with Alzheimer's disease progression.  
393 *Journal of Neuroscience*. 2012; 32(26):8890–8899.
- 394 **Bullmore E**, Sporns O. Complex brain networks: graph theoretical analysis of structural and functional systems.  
395 *Nature reviews neuroscience*. 2009; 10(3):186–198.
- 396 **Chen H**, Sheng X, Luo C, Qin R, Ye Q, Zhao H, Xu Y, Bai F, Initiative ADN. The compensatory phenomenon of the  
397 functional connectome related to pathological biomarkers in individuals with subjective cognitive decline.  
398 *Translational neurodegeneration*. 2020; 9:1–14.
- 399 **Chiesa PA**, Cavado E, Vergallo A, Lista S, Potier MC, Habert MO, Dubois B, de Schotten MT, Hampel H, Bakardjian  
400 H, et al. Differential default mode network trajectories in asymptomatic individuals at risk for Alzheimer's  
401 disease. *Alzheimer's & Dementia*. 2019; 15(7):940–950.
- 402 **Dai Z**, Yan C, Li K, Wang Z, Wang J, Cao M, Lin Q, Shu N, Xia M, Bi Y, et al. Identifying and mapping connectivity  
403 patterns of brain network hubs in Alzheimer's disease. *Cerebral cortex*. 2015; 25(10):3723–3742.
- 404 **Favaretto C**, Allegra M, Deco G, Metcalfe NV, Griffis JC, Shulman GL, Brovelli A, Corbetta M. Subcortical-cortical dy-  
405 namical states of the human brain and their breakdown in stroke. *Nature communications*. 2022; 13(1):5069.

- 406 **Fiorenzato E**, Strafella AP, Kim J, Schifano R, Weis L, Antonini A, Biundo R. Dynamic functional connectivity  
407 changes associated with dementia in Parkinson's disease. *Brain*. 2019; 142(9):2860–2872.
- 408 **Fischl B**. FreeSurfer. *Neuroimage*. 2012; 62(2):774–781.
- 409 **Frisoni G**, Testa C, Zorzan A, Sabattoli F, Beltramello A, Soininen H, Laakso M. Detection of grey matter loss in  
410 mild Alzheimer's disease with voxel based morphometry. *Journal of Neurology, Neurosurgery & Psychiatry*.  
411 2002; 73(6):657–664.
- 412 **Greicius MD**, Srivastava G, Reiss AL, Menon V. Default-mode network activity distinguishes Alzheimer's disease  
413 from healthy aging: evidence from functional MRI. *Proceedings of the National Academy of Sciences*. 2004;  
414 101(13):4637–4642.
- 415 **Gu Y**, Lin Y, Huang L, Ma J, Zhang J, Xiao Y, Dai Z, Initiative ADN. Abnormal dynamic functional connectivity in  
416 Alzheimer's disease. *CNS neuroscience & therapeutics*. 2020; 26(9):962–971.
- 417 **Hammond TC**, Xing X, Wang C, Ma D, Nho K, Crane PK, Elahi F, Ziegler DA, Liang G, Cheng Q, et al.  $\beta$ -amyloid  
418 and tau drive early Alzheimer's disease decline while glucose hypometabolism drives late decline. *Commu-  
419 nications biology*. 2020; 3(1):1–13.
- 420 **He Y**, Wang L, Zang Y, Tian L, Zhang X, Li K, Jiang T. Regional coherence changes in the early stages of Alzheimer's  
421 disease: a combined structural and resting-state functional MRI study. *Neuroimage*. 2007; 35(2):488–500.
- 422 **van den Heuvel MP**, Sporns O. A cross-disorder connectome landscape of brain dysconnectivity. *Nature  
423 reviews neuroscience*. 2019; 20(7):435–446.
- 424 **Huang J**, Jung JY, Nam CS. Estimating effective connectivity in Alzheimer's disease progression: A dynamic  
425 causal modeling study. *Frontiers in Human Neuroscience*. 2022; 16. [https://www.frontiersin.org/journals/  
426 human-neuroscience/articles/10.3389/fnhum.2022.1060936](https://www.frontiersin.org/journals/human-neuroscience/articles/10.3389/fnhum.2022.1060936), doi: 10.3389/fnhum.2022.1060936.
- 427 **Jenkinson M**, Beckmann CF, Behrens TE, Woolrich MW, Smith SM. FSL. *Neuroimage*. 2012; 62(2):782–790.
- 428 **Jie B**, Liu M, Lian C, Shi F, Shen D. Designing weighted correlation kernels in convolutional neural networks for  
429 functional connectivity based brain disease diagnosis. *Medical image analysis*. 2020; 63:101709.
- 430 **Li K**, Luo X, Zeng Q, Jiaerken Y, Xu X, Huang P, Shen Z, Xu J, Wang C, Zhou J, et al. Aberrant functional connec-  
431 tivity network in subjective memory complaint individuals relates to pathological biomarkers. *Translational  
432 neurodegeneration*. 2018; 7(1):1–10.
- 433 **Ou J**, Xie L, Jin C, Li X, Zhu D, Jiang R, Chen Y, Zhang J, Li L, Liu T. Characterizing and differentiating brain state  
434 dynamics via hidden Markov models. *Brain topography*. 2015; 28:666–679.
- 435 **Schaefer A**, Kong R, Gordon EM, Laumann TO, Zuo XN, Holmes AJ, Eickhoff SB, Yeo BT. Local-global parcellation  
436 of the human cerebral cortex from intrinsic functional connectivity MRI. *Cerebral cortex*. 2018; 28(9):3095–  
437 3114.
- 438 **Strom A**, Iaccarino L, Edwards L, Lesman-Segev OH, Soleimani-Meigooni DN, Pham J, Baker SL, Landau SM,  
439 Jagust WJ, Miller BL, et al. Cortical hypometabolism reflects local atrophy and tau pathology in symptomatic  
440 Alzheimer's disease. *Brain*. 2022; 145(2):713–728.
- 441 **Suk HI**, Wee CY, Lee SW, Shen D. State-space model with deep learning for functional dynamics estimation in  
442 resting-state fMRI. *Neuroimage*. 2016; 129:292–307.
- 443 **Tan C**, Liu X, Zhang G. Inferring brain state dynamics underlying naturalistic stimuli evoked emotion changes  
444 with DHA-HMM. *Neuroinformatics*. 2022; 20(3):737–753.
- 445 **Teipel SJ**, Metzger CD, Brosseron F, Buerger K, Brueggen K, Catak C, Diesing D, Dobisch L, Fliebach K, Franke  
446 C, et al. Multicenter resting state functional connectivity in prodromal and dementia stages of Alzheimer's  
447 disease. *Journal of Alzheimer's Disease*. 2018; 64(3):801–813.
- 448 **Thompson PM**, Hayashi KM, De Zubicaray G, Janke AL, Rose SE, Semple J, Herman D, Hong MS, Dittmer SS,  
449 Doddrell DM, et al. Dynamics of gray matter loss in Alzheimer's disease. *Journal of neuroscience*. 2003;  
450 23(3):994–1005.
- 451 **de Vos F**, Koini M, Schouten TM, Seiler S, van der Grond J, Lechner A, Schmidt R, de Rooij M, Rombouts SA. A com-  
452 prehensive analysis of resting state fMRI measures to classify individual patients with Alzheimer's disease.  
453 *Neuroimage*. 2018; 167:62–72.
- 454 **Zhang G**, Cai B, Zhang A, Stephen JM, Wilson TW, Calhoun VD, Wang YP. Estimating dynamic functional brain  
455 connectivity with a sparse hidden Markov model. *IEEE transactions on medical imaging*. 2019; 39(2):488–498.



**Table S1.** Participants' demographics

|      | #   | Age        | Sex (M/F) | APOE4 (0/1/2/U) | ADAS11     | MMSE       | CDRSB       |
|------|-----|------------|-----------|-----------------|------------|------------|-------------|
| HC   | 226 | 71.4 ± 6.1 | 99/127    | 136/50/5/35     | 6.2 ± 4.3  | 28.7 ± 1.8 | 0.37 ± 1.3  |
| SMC  | 160 | 71.6 ± 6.0 | 66/94     | 102/51/5/2      | 5.4 ± 3.2  | 29.1 ± 1.2 | 0.11 ± 0.39 |
| eMCI | 144 | 70.9 ± 7.2 | 78/66     | 75/38/13/18     | 8.8 ± 5.7  | 27.7 ± 2.4 | 1.71 ± 2.05 |
| IMCI | 130 | 72.0 ± 8.0 | 72/58     | 63/41/9/17      | 12.1 ± 6.6 | 26.4 ± 4.2 | 2.34 ± 2.59 |
| AD   | 67  | 74.8 ± 8.0 | 43/24     | 15/21/10/21     | 20.2 ± 6.4 | 22.7 ± 2.4 | 4.58 ± 2.00 |

**Table S2.** Participants' demographics

|      | #   | Age        | Sex (M/F) |
|------|-----|------------|-----------|
| HC   | 226 | 71.4 ± 6.1 | 99/127    |
| SMC  | 160 | 71.6 ± 6.0 | 66/94     |
| eMCI | 144 | 70.9 ± 7.2 | 78/66     |
| IMCI | 130 | 72.0 ± 8.0 | 72/58     |
| AD   | 67  | 74.8 ± 8.0 | 43/24     |

## Supplementary information

### Study Cohort Details

The demographic information of the cohort, including age, sex, and clinical scores, is reported in the tables S1, S2 and S3.

### Clinical and Cognitive Assessments

In this study, several well-established biomarkers and clinical assessments were used to evaluate the subject population. Below is a detailed explanation of each measure:

- **APOE4:** Apolipoprotein E (APOE) is a gene associated with Alzheimer's disease (AD) risk. The APOE4 allele is considered a major genetic risk factor for late-onset Alzheimer's disease. Individuals carrying one or two copies of the APOE4 allele are at an increased risk of developing AD.
- **ADAS11:** The Alzheimer's Disease Assessment Scale-Cognitive Subscale (ADAS-Cog) is a standard cognitive test used to measure the severity of cognitive impairment in Alzheimer's patients. ADAS11 refers to an 11-item version of this test, focusing on areas such as memory, language, and praxis.

**Table S3.** *p*-values of age comparisons in different populations, Kruskal-Wallis test for equal distributions, Dunn-Sidak correction for multiple comparisons (*n*=10).

| Group 1 | Group 2 | P-value         |
|---------|---------|-----------------|
| HC      | SMC     | <b>0.02</b>     |
| HC      | eMCI    | 0.87            |
| HC      | IMCI    | 0.10            |
| HC      | AD      | <b>&lt;1e-4</b> |
| SMC     | eMCI    | <b>&lt;1e-2</b> |
| SMC     | IMCI    | <b>&lt;1e-5</b> |
| SMC     | AD      | <b>&lt;1e-9</b> |
| eMCI    | IMCI    | 0.64            |
| eMCI    | AD      | <b>&lt;1e-2</b> |
| IMCI    | AD      | 0.09            |

- 472 • **MMSE:** The Mini-Mental State Examination (MMSE) is a widely used test for screening cogni-  
473 tive function. It includes questions designed to assess orientation, attention, memory, lan-  
474 guage, and visual-spatial skills. A lower score on the MMSE indicates greater cognitive impair-  
475 ment.  
476 • **CDRSB:** The Clinical Dementia Rating-Sum of Boxes (CDRSB) is a measure used to assess the  
477 severity of dementia symptoms. It provides a global rating of dementia severity by scoring  
478 patients across six domains, including memory, orientation, judgment, and personal care.

## 479 **MRI Data Acquisition and Preprocessing Details**

### 480 Acquisition parameters

481 Resting-state fMRI data were acquired on 3T MRI scanners with the following parameters (up-to-  
482 date information on the acquisition protocols can be found at [https://adni.loni.usc.edu/methods/documents/](https://adni.loni.usc.edu/methods/documents/protocols/)  
483 protocols/).

- 484 • Repetition/echo time (TR/TE): 3000/30 ms  
485 • Flip angle (FA): 90°  
486 • Field of view (FOV): 220x220x163 mm  
487 • Voxel size: 3.4-mm isotropic  
488 • Number of volumes: 200 (with small variations, e.g., 197 volumes in a few cases)

489 T1-weighted structural images were collected with the following parameters:

- 490 • TR = 2300 ms, TE = minimum  
491 • Inversion time (TI) = 900 ms  
492 • FOV = 208x240x256 mm  
493 • Voxel size: 1-mm isotropic

### 494 Preprocessing Steps

495 Resting-state fMRI data were preprocessed using the FMRIB Software Library (FSL version 6.0) with  
496 the following steps:

#### 497 • **Initial preprocessing:**

- 498 – Removal of the first 5 volumes  
499 – Motion correction using MCFLIRT  
500 – 4D mean intensity normalization  
501 – Spatial smoothing with a 6-mm full-width half maximum (FWHM) kernel  
502 – Interleaved slice-timing correction

#### 503 • **Regressing out confounds:**

- 504 – The six motion parameters (plus their derivatives), white matter (WM), and cerebrospinal  
505 fluid (CSF) signals were regressed out along with a linear trend component.  
506 – WM and CSF signals were extracted from segmented T1-weighted scans, registered to  
507 the fMRI native space, and eroded and binarized with a threshold of 0.8.

#### 508 • **Band-pass filtering:**

- 509 – A band-pass filter was applied with a frequency range of 0.01-0.08 Hz.

#### 510 • **Scrubbing and zero-padding:**

- 511 – High-motion frames (defined as exceeding 0.5 mm framewise displacement) were scrubbed.  
512 – Zero-padding of the volumes, along with one preceding and two subsequent volumes,  
513 was performed to ensure data consistency across subjects.

#### 514 • **Normalization:**

515 – The preprocessed rs-fMRI volumes were spatially normalized to the 2-mm Montreal Neu-  
516 rological Institute (MNI) space using both linear and non-linear registration techniques  
517 (FLIRT and FNIRT).

518 The Schaefer functional atlas *Schaefer et al. (2018)* with 100 parcels and 7 RSNs was used to ex-  
519 tract the mean time course for each region of interest (ROI), which were normalized using  $Z$ -score  
520 before further processing.  
521 The T1-weighted volumes were minimally preprocessed for bias-field correction (*fs\_l\_anat* tool *Jenk-*  
522 *inson et al. (2012)*), and a complete brain parcellation/segmentation was performed using FreeSurfer  
523 version 7.0 *Fischl (2012)*. In this study, we focused our analyses on three regions of interest, that  
524 are Hippocampus and Amygdala, which are relevant to AD, and cerebellum cortex, which is a con-  
525 trol region that is not typically affected by the disease *Braak and Braak (1991)*; *Thompson et al.*  
526 *(2003)*; *Frisoni et al. (2002)*. The volumes of these regions were then normalized by the estimated  
527 total intracranial volume of the respective subject, and averaged over hemispheres.

## 528 Network structure

### 529 Convolutional layers

530 The input of the network is the vectorized, pairwise product of the timeseries for all ROIs, while the  
531 shape of the time window used to compute the correlations is learned by the network itself (i.e., it  
532 is defined by the kernels of the time convolution layer of the network). More in detail:

$$k(x_i, x_j) = \sum_{l=1}^{L_1} w^l x_i x_j \quad (2)$$

533 where  $x_i$  and  $x_j$  are the normalized time series for ROIs  $i$  and  $j$ , while  $w = [w^1, w^2, \dots, w^{L_1}]$  is one  
534 of the learnable weight vectors. The proposed approach reduces to the computation of Pearson's  
535 coefficient of correlation if all elements in  $w$  equal 1. Differently from *Jie et al. (2020)*, here only one  
536 spatial convolutional layer is used. As the dimension of the kernels of this layer equals that of its  
537 inputs and no padding is performed, the outputs of this layer project the dFC matrices computed  
538 with the windowing technique described above to a space of dimension  $1 \times L_2$ . Here,  $L_1$  and  $L_2$  are  
539 the number of kernels used in the temporal and spatial convolutional layer, respectively.

### 540 Non-linearity layers

541 Each convolutional layer described above is followed by a leaky ReLU layer with scale parameter  
542  $\alpha = 0.5$ . The element-wise transformation applied by this layer is thus described by:

$$y^{(l)} = \max(x^{(l)}, \alpha x^{(l)}) \quad (3)$$

### 543 Fully connected and batch normalization layer

544 The fully connected layer is added to perform a final projection of each input to a  $1 \times 3$  vector. The  
545 set of experiments we performed showed that increasing this dimension resulted in additional  
546 computation time with no significant differences in terms of final output results (data not shown).

547 A batch normalization layer has been added to prevent degenerate solutions: as the network  
548 is trying to maximize the likelihood of the input sequences (see ), an obvious (and non-useful)  
549 solution would be to collapse all data to the same value, e.g., by setting all the weights of the  
550 fully connected layer to zero. The presence of a batch normalization layer prevents that from  
551 happening, as it decouples network loss from simple scale manipulations that would eventually  
552 lead to a degenerate solution.

### 553 Radial basis function

554 Each radial basis function neuron, as implemented here, learns the parameters of a multivariate  
555 normal distribution with covariance matrix  $\Sigma = \sigma^2 I$ .

556  $x^s(t)$  is the  $1 \times 3$  output of the preceding fully connected layer for subject  $s$  at time  $t$  and the  
557 output  $\phi_i^s(t)$  is the likelihood of  $x^s(t)$  for hidden state  $i$ :

$$\phi_i^s(t) = \exp\left(-\frac{\|x^s(t) - c_i\|^2}{2\sigma_i^2}\right) \quad (4)$$

558 where  $\|\cdot\|$  is the Euclidean norm,  $c_i$  and  $\sigma_i$  are the learned parameters of neuron  $i$  (center and  
559 width, respectively).

#### 560 Likelihood layer

561 The last layer receives as inputs the sequence in time of likelihoods for each state and provides  
562 as output the likelihood of the most probable time sequences. This layer implements part of the  
563 Viterbi algorithm: all states have the same probability for  $t = 1$ , while each element of the transition  
564 matrix  $A^s$  for subject  $s$  is estimated as:

$$A_{ij}^s = \frac{\sum_{t=1}^{T-1} \phi_i^s(t)\phi_j^s(t+1)}{\sum_{t=1}^{T-1} \phi_i^s(t)} \quad (5)$$

565 The transition matrix  $A$  is estimated at each iteration as the average of  $A^s$  across all subjects.  
566  $T_1^s$  at the last time point contains the likelihood of the observations for the most likely sequence of  
567 states for subject  $s$ .  $T_2^s$  contains the information needed to reconstruct the most likely sequence  
568 of visited hidden states. However, the sequence itself is not required to compute the loss function  
569 (see Section ) and it is therefore computed separately from network operations.

#### 570 Loss function

571 The loss function used for network training is a function of two terms: the opposite of the log-  
572 likelihood of the most probable sequence (i.e.,  $L_{abs} = -\log(\max_i(T_1[i, T]))$ ) and the same quantity  
573 for a sham sequence  $L_{sham}$  in which the time positions of the network inputs have been randomly  
574 shuffled.

575 The definition of the complete loss term used in training is, therefore:

$$\lambda = \sqrt{L_{abs}^2 + \left(\frac{L_{abs}}{L_{sham}}\right)^2} \quad (6)$$
